# Supplementary material for: Comparative Analysis of Normoxia- and Hypoxia-Modified Extracellular Vesicle Therapy in Function, Perfusion, and Collateralization in Chronically Ischemic Myocardium
Source: MDPI journal article supplement (doi:10.3390/ijms24032076), 2023-01-20
Supplement: s1 [file s1]

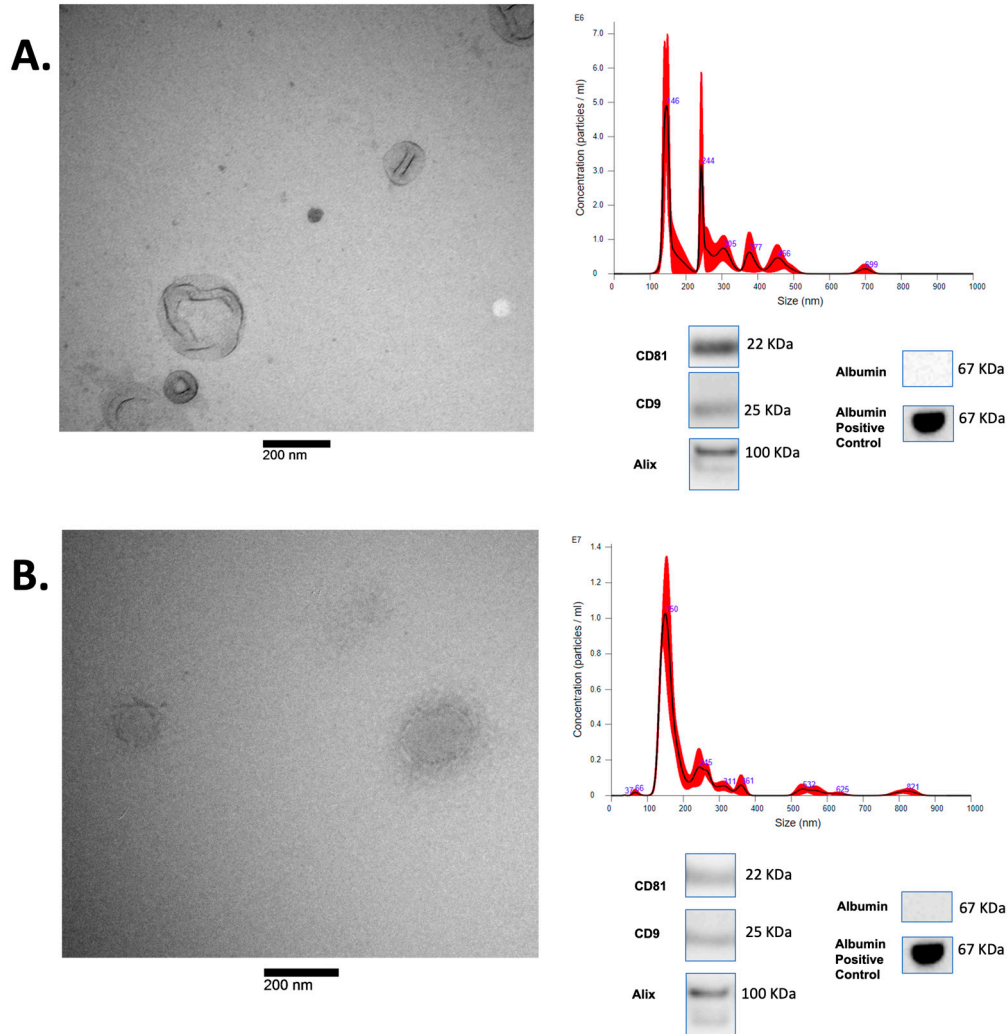

**Figure S1.** Characterization of HBMSC-EV. (A) Normoxia serum-starved EV characterization shown, including electron microscopy image of human bone marrow-derived mesenchymal stem-cell extracellular vesicle (HBMSC-EV) particle (magnification 54,800 $\times$ ), nanoparticle tracking analysis which determined mean particle size to be 252.7 nm  $\pm$  9.7 nm, and Western blot which identified typical HBMSC-EV transmembrane proteins CD81 and CD9, and cytosolic protein Alix. The lack of albumin demonstrates sample purity. (B) Hypoxia-modified EV characterization shown, including electron microscopy image of HBMSC-EV particle (magnification 54,800 $\times$ ), Nanoparticle tracking analysis which determined mean particle size to be 217.3 nm  $\pm$  10.9 nm, and Western blot which identified typical HBMSC-EV transmembrane proteins CD81 and CD9, and cytosolic protein Alix. The lack of albumin demonstrates sample purity.

**Table S1.** Antibody Information.

| Antibody Name               | Source Species | Dilution | Manufacturer Name | Manufacturer Location | Catalog Number |
|-----------------------------|----------------|----------|-------------------|-----------------------|----------------|
| Akt                         | Rabbit         | 1:1000   | Cell Signaling    | Danvers, MA, USA      | 9272           |
| Albumin                     | Rabbit         | 1:1000   | Cell Signaling    | Danvers, MA, USA      | 4929S          |
| Alix                        | Rabbit         | 1:1000   | Cell Signaling    | Danvers, MA, USA      | 92880S         |
| Angiostatin                 | Rabbit         | 1:500    | Abcam             | Cambridge, UK         | 2904           |
| Anti-Rabbit IgG, HRP-linked | Goat           | 1:4000   | Cell Signaling    | Danvers, MA, USA      | 7074           |
| CD81                        | Rabbit         | 1:1000   | Cell Signaling    | Danvers, MA, USA      | 52892S         |
| CD9                         | Rabbit         | 1:1000   | Cell Signaling    | Danvers, MA, USA      | 13403S         |
| Endostatin                  | Rabbit         | 1:1000   | Abcam             | Cambridge, UK         | 207162         |
| eNOS                        | Rabbit         | 1:1000   | Cell Signaling    | Danvers, MA, USA      | 32027          |
| ERK1/2                      | Rabbit         | 1:1000   | Cell Signaling    | Danvers, MA, USA      | 4695           |
| GAPDH                       | Mouse          | 1:1000   | Cell Signaling    | Danvers, MA, USA      | 97166          |
| p-Akt (Ser473)              | Rabbit         | 1:1000   | Cell Signaling    | Danvers, MA, USA      | 4060           |
| p-eNOS (Ser1177)            | Rabbit         | 1:1000   | Cell Signaling    | Danvers, MA, USA      | 9571           |
| p-ERK1/2 (Thr202/204)       | Rabbit         | 1:1000   | Cell Signaling    | Danvers, MA, USA      | 4370           |
| VE-Cadherin                 | Rabbit         | 1:1000   | Cell Signaling    | Danvers, MA, USA      | 2500           |

Antibodies used in this study are listed along with corresponding source species, dilution, manufacturer and catalog numbers. IgG, immunoglobulin G; HRP, horseradish peroxidase; CD, cluster of differentiation; eNOS, endothelial nitric oxide synthase; ERK, extracellular regulated kinase 1/2; GAPDH, glyceraldehyde-3-phosphate dehydrogenase; p-, phosphorylated; VE-Cadherin, vascular endothelial cadherin.
